# Supplementary material for: Interactions between two functionally distinct aquatic invertebrate herbivores complicate ecosystem- and population-level resilience
Source: PeerJ journal article supplement (doi:10.7717/peerj.14103), 2022-10-07
Supplement: Supplement.pdf [file Supplement.pdf]

**SUPPLEMENT TO: Aquatic ecosystem and population level resilience complicated by interactions between invertebrate herbivores**

**Authors:** Jo A. Werba, Alexander C. Phong, Lakhdeep Brar, Acacia Frempong-Manso, Ofure Vanessa Oware and Jurek Kolasa

The supplement contains algal species information.

Figure 1: This figure shows all algal species that represent greater than 0.5% of the community for the starting (A.), mid-point (B.) and end of the experiment (C.). Point color is herbivore combination. Point shape is perturbation treatment. Points are mean and error bars are standard deviation. (N=10 for all treatments)

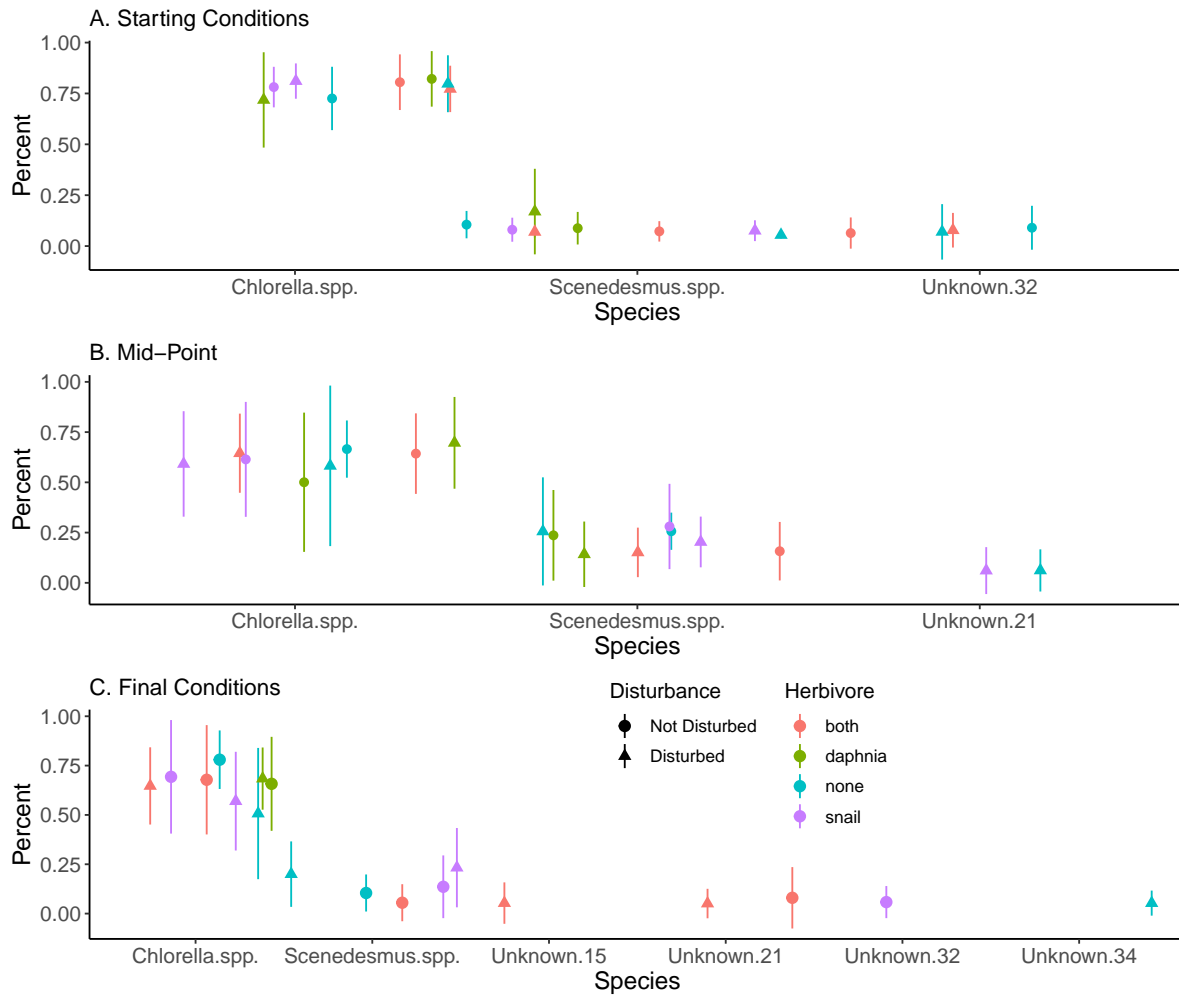

Figure 2: This figure shows all algal species on the first day of the experiment

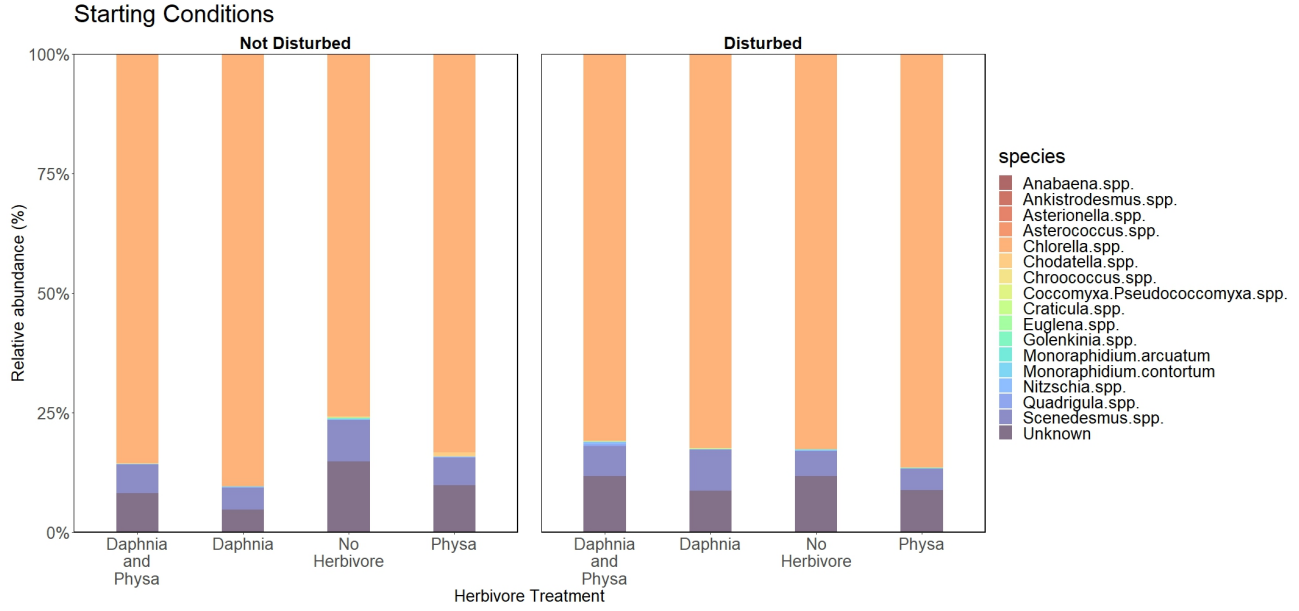

Figure 3: This figure shows all algal species at the mid-point of the experiment prior to any disturbance treatment

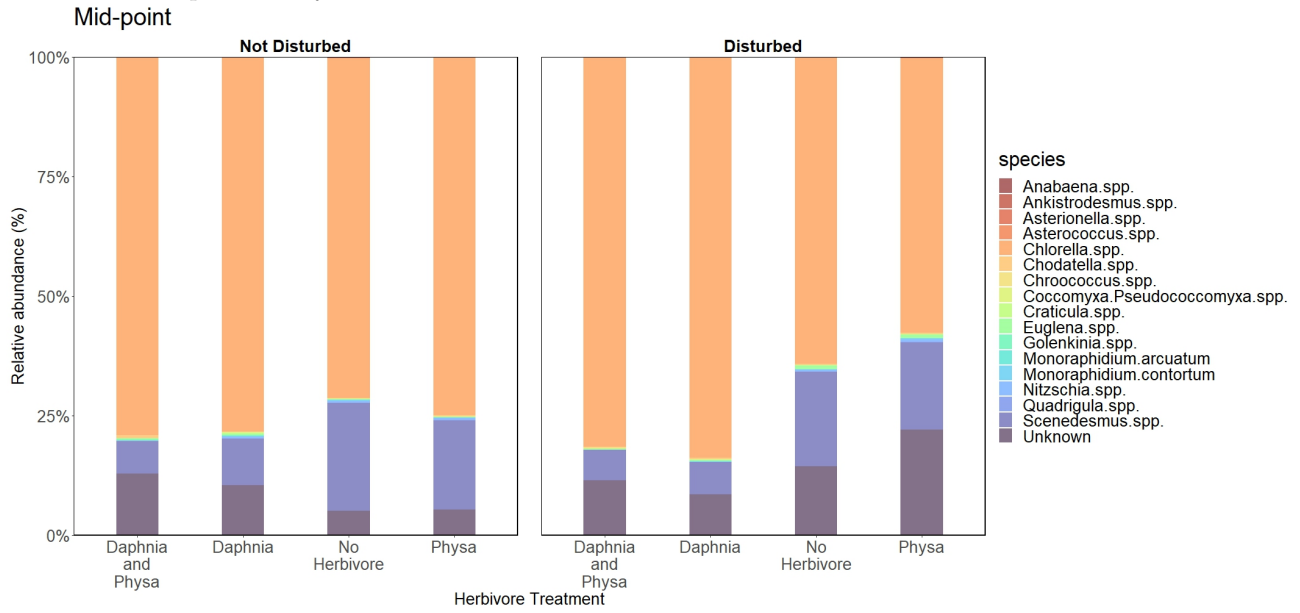

Figure 4: This figure shows all algal species at the end of the experiment

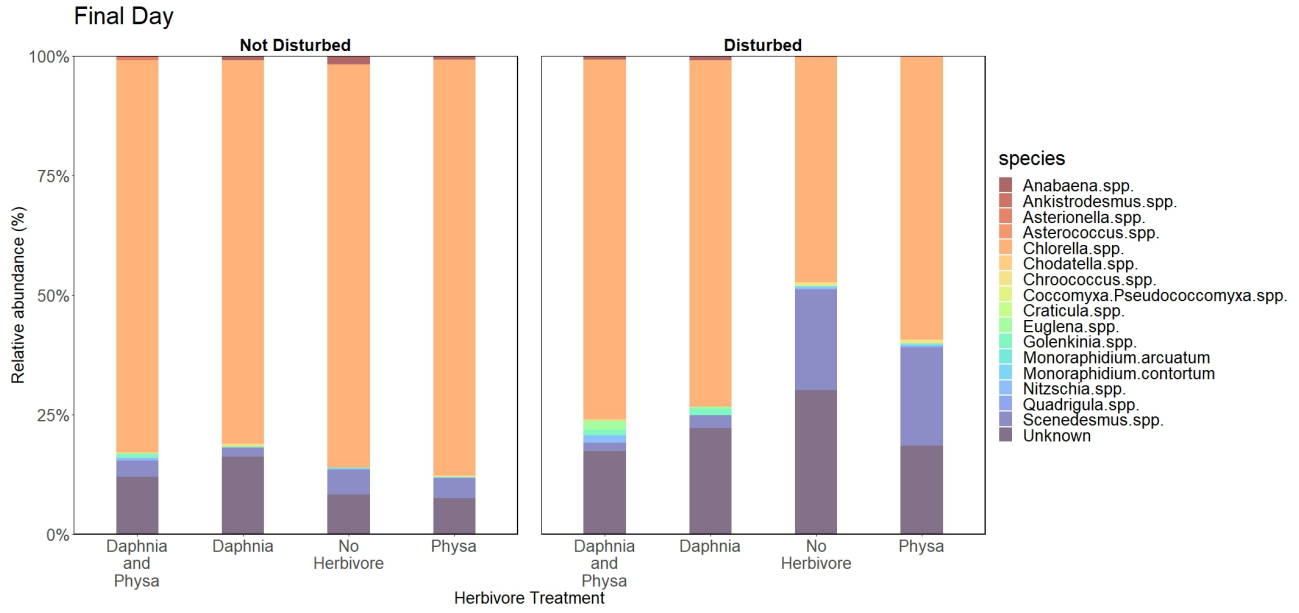

## Algae Species Tables

Table 1: Algal species found each treatment

| Herbivore Treatment                  | Disturb       | Collection point | Taxa                | Count |   |                 |     |
|--------------------------------------|---------------|------------------|---------------------|-------|---|-----------------|-----|
| <i>D. magna</i> and <i>Physa</i> sp. | Not Disturbed | 1                | Anabaena.spp.       | 1     |   |                 |     |
|                                      |               |                  | Ankistrodesmus.spp. | 2     |   |                 |     |
|                                      |               |                  | Chlorella.spp.      | 1617  |   |                 |     |
|                                      |               |                  | Chodatella.spp.     | 1     |   |                 |     |
|                                      |               |                  | Chroococcus.spp.    | 1     |   |                 |     |
|                                      |               |                  | Nitzschia.spp.      | 3     |   |                 |     |
|                                      |               |                  | Scenedesmus.spp.    | 114   |   |                 |     |
|                                      |               |                  | Unknown.36          | 1     |   |                 |     |
|                                      |               |                  | Unknown.14          | 2     |   |                 |     |
|                                      |               |                  | Unknown.15          | 3     |   |                 |     |
|                                      |               |                  | Unknown.17          | 6     |   |                 |     |
|                                      |               |                  | Unknown.21          | 3     |   |                 |     |
|                                      |               |                  | Unknown.27          | 1     |   |                 |     |
|                                      |               |                  | Unknown.30          | 4     |   |                 |     |
|                                      |               |                  | Unknown.31          | 6     |   |                 |     |
|                                      |               |                  | Unknown.32          | 68    |   |                 |     |
|                                      |               |                  | Unknown.34          | 5     |   |                 |     |
|                                      |               |                  | Unknown.35          | 1     |   |                 |     |
|                                      |               |                  | Unknown.37          | 2     |   |                 |     |
|                                      |               |                  | Unknown.38          | 1     |   |                 |     |
|                                      |               |                  | Unknown.39          | 19    |   |                 |     |
|                                      |               |                  | Unknown.4           | 1     |   |                 |     |
|                                      |               |                  | Unknown.41          | 1     |   |                 |     |
|                                      |               |                  | Unknown.42          | 2     |   |                 |     |
|                                      |               |                  | Unknown.9           | 28    |   |                 |     |
|                                      |               |                  |                     |       | 2 | Chlorella.spp.  | 718 |
|                                      |               |                  |                     |       |   | Chodatella.spp. | 5   |
|                                      |               |                  |                     |       |   | Euglena.spp.    | 2   |
|                                      |               |                  | Golenkinia.spp.     | 3     |   |                 |     |
|                                      |               |                  | Unknown.18          | 4     |   |                 |     |
|                                      |               |                  | Quadrigula.spp.     | 1     |   |                 |     |
|                                      |               |                  | Scenedesmus.spp.    | 61    |   |                 |     |
|                                      |               |                  | Unknown.10          | 1     |   |                 |     |
|                                      |               |                  | Unknown.11          | 3     |   |                 |     |
|                                      |               |                  | Unknown.14          | 1     |   |                 |     |
|                                      |               |                  | Unknown.15          | 1     |   |                 |     |
|                                      |               |                  | Unknown.17          | 4     |   |                 |     |
|                                      |               |                  | Unknown.19          | 1     |   |                 |     |
|                                      |               |                  | Unknown.21          | 9     |   |                 |     |

Table 1: Algal species found each treatment

| Herbivore Treatment | Disturb | Collection point | Taxa              | Count |
|---------------------|---------|------------------|-------------------|-------|
|                     |         |                  | Unknown.22        | 5     |
|                     |         |                  | Unknown.25        | 1     |
|                     |         |                  | Unknown.26        | 1     |
|                     |         |                  | Unknown.3         | 2     |
|                     |         |                  | Unknown.30        | 2     |
|                     |         |                  | Unknown.32        | 13    |
|                     |         |                  | Unknown.34        | 5     |
|                     |         |                  | Unknown.35        | 8     |
|                     |         |                  | Unknown.37        | 10    |
|                     |         |                  | Unknown.38        | 4     |
|                     |         |                  | Unknown.4         | 1     |
|                     |         |                  | Unknown.41        | 1     |
|                     |         |                  | Unknown.42        | 3     |
|                     |         |                  | Unknown.43        | 1     |
|                     |         |                  | Unknown.44        | 4     |
|                     |         |                  | Unknown.50        | 5     |
|                     |         |                  | Unknown.55        | 2     |
|                     |         |                  | Unknown.57        | 3     |
|                     |         |                  | Unknown.62        | 1     |
|                     |         |                  | Unknown.64        | 1     |
|                     |         |                  | Unknown.65        | 2     |
|                     |         |                  | Unknown.68        | 3     |
|                     |         |                  | Unknown.69        | 2     |
|                     |         |                  | Unknown.70        | 2     |
|                     |         |                  | Unknown.9         | 11    |
|                     |         | <b>3</b>         | Anabaena.spp.     | 1     |
|                     |         |                  | Asterionella.spp. | 2     |
|                     |         |                  | Chlorella.spp.    | 268   |
|                     |         |                  | Chroococcus.spp.  | 1     |
|                     |         |                  | Golenkinia.spp.   | 3     |
|                     |         |                  | Unknown.18        | 3     |
|                     |         |                  | Nitzschia.spp.    | 1     |
|                     |         |                  | Quadrigula.spp.   | 1     |
|                     |         |                  | Scenedesmus.spp.  | 11    |
|                     |         |                  | Unknown.14        | 1     |
|                     |         |                  | Unknown.16        | 1     |
|                     |         |                  | Unknown.21        | 10    |
|                     |         |                  | Unknown.23        | 1     |
|                     |         |                  | Unknown.25        | 1     |
|                     |         |                  | Unknown.32        | 8     |
|                     |         |                  | Unknown.35        | 3     |
|                     |         |                  | Unknown.38        | 2     |

Table 1: Algal species found each treatment

| Herbivore Treatment                  | Disturb   | Collection point | Taxa                | Count |
|--------------------------------------|-----------|------------------|---------------------|-------|
|                                      |           |                  | Unknown.41          | 1     |
|                                      |           |                  | Unknown.42          | 1     |
|                                      |           |                  | Unknown.43          | 1     |
|                                      |           |                  | Unknown.44          | 1     |
|                                      |           |                  | Unknown.54          | 1     |
|                                      |           |                  | Unknown.9           | 4     |
| <i>D. magna</i> and <i>Physa</i> sp. | Disturbed | 1                | Ankistrodesmus.spp. | 1     |
|                                      |           |                  | Chlorella.spp.      | 1064  |
|                                      |           |                  | Chodatella.spp.     | 1     |
|                                      |           |                  | Euglena.spp.        | 1     |
|                                      |           |                  | Golenkinia.spp.     | 1     |
|                                      |           |                  | Nitzschia.spp.      | 7     |
|                                      |           |                  | Quadrigula.spp.     | 4     |
|                                      |           |                  | Scenedesmus.spp.    | 82    |
|                                      |           |                  | Unknown.14          | 1     |
|                                      |           |                  | Unknown.15          | 1     |
|                                      |           |                  | Unknown.16          | 1     |
|                                      |           |                  | Unknown.17          | 4     |
|                                      |           |                  | Unknown.21          | 5     |
|                                      |           |                  | Unknown.23          | 1     |
|                                      |           |                  | Unknown.25          | 1     |
|                                      |           |                  | Unknown.31          | 8     |
|                                      |           |                  | Unknown.32          | 72    |
|                                      |           |                  | Unknown.34          | 6     |
|                                      |           |                  | Unknown.35          | 5     |
|                                      |           |                  | Unknown.37          | 1     |
|                                      |           |                  | Unknown.38          | 10    |
|                                      |           |                  | Unknown.39          | 12    |
|                                      |           |                  | Unknown.4           | 2     |
|                                      |           |                  | Unknown.42          | 2     |
|                                      |           |                  | Unknown.44          | 6     |
|                                      |           |                  | Unknown.45          | 2     |
|                                      |           |                  | Unknown.48          | 1     |
|                                      |           |                  | Unknown.8           | 1     |
|                                      |           |                  | Unknown.9           | 13    |
|                                      |           | 2                | Chlorella.spp.      | 608   |
|                                      |           |                  | Chodatella.spp.     | 1     |
|                                      |           |                  | Chroococcus.spp.    | 2     |
|                                      |           |                  | Euglena.spp.        | 2     |
|                                      |           |                  | known.18            | 1     |
|                                      |           |                  | Scenedesmus.spp.    | 47    |



Table 1: Algal species found each treatment

| Herbivore Treatment | Disturb | Collection point | Taxa             | Count |
|---------------------|---------|------------------|------------------|-------|
|                     |         |                  | Unknown.10       | 2     |
|                     |         |                  | Unknown.11       | 1     |
|                     |         |                  | Unknown.14       | 4     |
|                     |         |                  | Unknown.15       | 1     |
|                     |         |                  | Unknown.19       | 7     |
|                     |         |                  | Unknown.21       | 15    |
|                     |         |                  | Unknown.22       | 3     |
|                     |         |                  | Unknown.32       | 7     |
|                     |         |                  | Unknown.34       | 1     |
|                     |         |                  | Unknown.35       | 3     |
|                     |         |                  | Unknown.37       | 6     |
|                     |         |                  | Unknown.38       | 2     |
|                     |         |                  | Unknown.39       | 1     |
|                     |         |                  | Unknown.4        | 1     |
|                     |         |                  | Unknown.41       | 1     |
|                     |         |                  | Unknown.42       | 1     |
|                     |         |                  | Unknown.49       | 1     |
|                     |         |                  | Unknown.50       | 6     |
|                     |         |                  | Unknown.55       | 2     |
|                     |         |                  | Unknown.57       | 2     |
|                     |         |                  | Unknown.60       | 1     |
|                     |         |                  | Unknown.61       | 1     |
|                     |         |                  | Unknown.62       | 1     |
|                     |         |                  | Unknown.64       | 2     |
|                     |         |                  | Unknown.65       | 1     |
|                     |         |                  | Unknown.66       | 1     |
|                     |         |                  | Unknown.68       | 2     |
|                     |         |                  | Unknown.9        | 9     |
|                     |         | <b>3</b>         | Anabaena.spp.    | 2     |
|                     |         |                  | Chlorella.spp.   | 200   |
|                     |         |                  | Chodatella.spp.  | 1     |
|                     |         |                  | Euglena.spp.     | 5     |
|                     |         |                  | Golenkinia.spp.  | 3     |
|                     |         |                  | Nitzschia.spp.   | 4     |
|                     |         |                  | Scenedesmus.spp. | 5     |
|                     |         |                  | Unknown.14       | 1     |
|                     |         |                  | Unknown.15       | 5     |
|                     |         |                  | Unknown.16       | 1     |
|                     |         |                  | Unknown.20       | 1     |
|                     |         |                  | Unknown.21       | 8     |
|                     |         |                  | Unknown.22       | 1     |
|                     |         |                  | Unknown.25       | 1     |

Table 1: Algal species found each treatment

| Herbivore Treatment  | Disturb       | Collection point | Taxa                    | Count |
|----------------------|---------------|------------------|-------------------------|-------|
|                      |               |                  | Unknown.26              | 1     |
|                      |               |                  | Unknown.32              | 12    |
|                      |               |                  | Unknown.34              | 1     |
|                      |               |                  | Unknown.35              | 2     |
|                      |               |                  | Unknown.37              | 1     |
|                      |               |                  | Unknown.38              | 1     |
|                      |               |                  | Unknown.39              | 1     |
|                      |               |                  | Unknown.41              | 1     |
|                      |               |                  | Unknown.50              | 1     |
|                      |               |                  | Unknown.56              | 1     |
|                      |               |                  | Unknown.58              | 1     |
|                      |               |                  | Unknown.9               | 5     |
| <i>D. magna</i> only | Not Disturbed | 1                | Ankistrodesmus.spp.     | 2     |
|                      |               |                  | Chlorella.spp.          | 2180  |
|                      |               |                  | Chodatella.spp.         | 1     |
|                      |               |                  | Chroococcus.spp.        | 1     |
|                      |               |                  | Monoraphidium contortum | 1     |
|                      |               |                  | Nitzschia.spp.          | 4     |
|                      |               |                  | Scenedesmus.spp.        | 110   |
|                      |               |                  | Unknown.10              | 1     |
|                      |               |                  | Unknown.13              | 1     |
|                      |               |                  | Unknown.14              | 1     |
|                      |               |                  | Unknown.15              | 1     |
|                      |               |                  | Unknown.16              | 4     |
|                      |               |                  | Unknown.17              | 9     |
|                      |               |                  | Unknown.21              | 3     |
|                      |               |                  | Unknown.23              | 1     |
|                      |               |                  | Unknown.3               | 2     |
|                      |               |                  | Unknown.31              | 3     |
|                      |               |                  | Unknown.32              | 32    |
|                      |               |                  | Unknown.34              | 8     |
|                      |               |                  | Unknown.35              | 3     |
|                      |               |                  | Unknown.37              | 2     |
|                      |               |                  | Unknown.38              | 3     |
|                      |               |                  | Unknown.39              | 7     |
|                      |               |                  | Unknown.4               | 1     |
|                      |               |                  | Unknown.41              | 1     |
|                      |               |                  | Unknown.43              | 2     |
|                      |               |                  | Unknown.44              | 5     |
|                      |               |                  | Unknown.48              | 1     |

Table 1: Algal species found each treatment

| Herbivore Treatment | Disturb | Collection point | Taxa                   | Count |
|---------------------|---------|------------------|------------------------|-------|
|                     |         |                  | Unknown.6              | 1     |
|                     |         |                  | Unknown.9              | 22    |
|                     |         | <b>2</b>         | Chlorella.spp.         | 559   |
|                     |         |                  | Chodatella.spp.        | 1     |
|                     |         |                  | Coccomyxa              | 1     |
|                     |         |                  | Pseudococcomyxa.spp.   |       |
|                     |         |                  | Craticula.spp.         | 2     |
|                     |         |                  | Euglena.spp.           | 2     |
|                     |         |                  | Golenkinia.spp.        | 1     |
|                     |         |                  | Unknown.18             | 1     |
|                     |         |                  | Monoraphidium arcuatum | 1     |
|                     |         |                  | Nitzschia.spp.         | 2     |
|                     |         |                  | Quadrigula.spp.        | 1     |
|                     |         |                  | Scenedesmus.spp.       | 69    |
|                     |         |                  | Unknown.10             | 2     |
|                     |         |                  | Unknown.14             | 1     |
|                     |         |                  | Unknown.21             | 11    |
|                     |         |                  | Unknown.22             | 5     |
|                     |         |                  | Unknown.25             | 2     |
|                     |         |                  | Unknown.3              | 1     |
|                     |         |                  | Unknown.30             | 1     |
|                     |         |                  | Unknown.32             | 14    |
|                     |         |                  | Unknown.34             | 1     |
|                     |         |                  | Unknown.35             | 3     |
|                     |         |                  | Unknown.37             | 12    |
|                     |         |                  | Unknown.38             | 3     |
|                     |         |                  | Unknown.4              | 1     |
|                     |         |                  | Unknown.50             | 5     |
|                     |         |                  | Unknown.55             | 1     |
|                     |         |                  | Unknown.56             | 2     |
|                     |         |                  | Unknown.6              | 1     |
|                     |         |                  | Unknown.63             | 1     |
|                     |         |                  | Unknown.68             | 2     |
|                     |         |                  | Unknown.69             | 1     |
|                     |         |                  | Unknown.9              | 4     |
|                     |         | <b>3</b>         | Anabaena.spp.          | 3     |
|                     |         |                  | Chlorella.spp.         | 253   |
|                     |         |                  | Chodatella.spp.        | 1     |
|                     |         |                  | Chroococcus.spp.       | 1     |
|                     |         |                  | Golenkinia.spp.        | 1     |
|                     |         |                  | Unknown.18             | 3     |

Table 1: Algal species found each treatment

| Herbivore Treatment  | Disturb          | Collection point | Taxa             | Count |
|----------------------|------------------|------------------|------------------|-------|
|                      |                  |                  | Scenedesmus.spp. | 6     |
|                      |                  |                  | Unknown.10       | 1     |
|                      |                  |                  | Unknown.11       | 1     |
|                      |                  |                  | Unknown.14       | 2     |
|                      |                  |                  | Unknown.15       | 5     |
|                      |                  |                  | Unknown.17       | 1     |
|                      |                  |                  | Unknown.19       | 1     |
|                      |                  |                  | Unknown.20       | 1     |
|                      |                  |                  | Unknown.21       | 8     |
|                      |                  |                  | Unknown.22       | 2     |
|                      |                  |                  | Unknown.25       | 1     |
|                      |                  |                  | Unknown.3        | 1     |
|                      |                  |                  | Unknown.31       | 1     |
|                      |                  |                  | Unknown.32       | 15    |
|                      |                  |                  | Unknown.35       | 2     |
|                      |                  |                  | Unknown.38       | 1     |
|                      |                  |                  | Unknown.44       | 1     |
|                      |                  |                  | Unknown.48       | 1     |
|                      |                  |                  | Unknown.63       | 1     |
|                      |                  |                  | Unknown.9        | 2     |
| <i>D. magna</i> only | <b>Disturbed</b> | <b>1</b>         | Anabaena.spp.    | 1     |
|                      |                  |                  | Chlorella.spp.   | 1079  |
|                      |                  |                  | Chodatella.spp.  | 1     |
|                      |                  |                  | Chroococcus.spp. | 1     |
|                      |                  |                  | Euglena.spp.     | 1     |
|                      |                  |                  | Golenkinia.spp.  | 1     |
|                      |                  |                  | Quadrigula.spp.  | 1     |
|                      |                  |                  | Scenedesmus.spp. | 113   |
|                      |                  |                  | Unknown.10       | 1     |
|                      |                  |                  | Unknown.14       | 1     |
|                      |                  |                  | Unknown.15       | 6     |
|                      |                  |                  | Unknown.16       | 2     |
|                      |                  |                  | Unknown.17       | 5     |
|                      |                  |                  | Unknown.21       | 1     |
|                      |                  |                  | Unknown.25       | 1     |
|                      |                  |                  | Unknown.27       | 1     |
|                      |                  |                  | Unknown.30       | 4     |
|                      |                  |                  | Unknown.31       | 1     |
|                      |                  |                  | Unknown.32       | 21    |
|                      |                  |                  | Unknown.38       | 24    |
|                      |                  |                  | Unknown.39       | 4     |

Table 1: Algal species found each treatment

| Herbivore Treatment | Disturb | Collection point | Taxa                    | Count |
|---------------------|---------|------------------|-------------------------|-------|
|                     |         |                  | Unknown.41              | 2     |
|                     |         |                  | Unknown.44              | 5     |
|                     |         |                  | Unknown.45              | 2     |
|                     |         |                  | Unknown.9               | 32    |
|                     |         | <b>2</b>         | Ankistrodesmus.spp.     | 1     |
|                     |         |                  | Chlorella.spp.          | 961   |
|                     |         |                  | Chodatella.spp.         | 3     |
|                     |         |                  | Chroococcus.spp.        | 1     |
|                     |         |                  | Craticula.spp.          | 1     |
|                     |         |                  | Euglena.spp.            | 2     |
|                     |         |                  | Golenkinia.spp.         | 1     |
|                     |         |                  | Unknown.18              | 1     |
|                     |         |                  | Monoraphidium contortum | 1     |
|                     |         |                  | Nitzschia.spp.          | 1     |
|                     |         |                  | Scenedesmus.spp.        | 77    |
|                     |         |                  | Unknown.36              | 1     |
|                     |         |                  | Unknown.10              | 2     |
|                     |         |                  | Unknown.11              | 2     |
|                     |         |                  | Unknown.14              | 1     |
|                     |         |                  | Unknown.15              | 1     |
|                     |         |                  | Unknown.17              | 4     |
|                     |         |                  | Unknown.19              | 2     |
|                     |         |                  | Unknown.21              | 18    |
|                     |         |                  | Unknown.22              | 1     |
|                     |         |                  | Unknown.25              | 2     |
|                     |         |                  | Unknown.26              | 1     |
|                     |         |                  | Unknown.31              | 2     |
|                     |         |                  | Unknown.32              | 7     |
|                     |         |                  | Unknown.34              | 4     |
|                     |         |                  | Unknown.35              | 4     |
|                     |         |                  | Unknown.37              | 8     |
|                     |         |                  | Unknown.38              | 2     |
|                     |         |                  | Unknown.4               | 3     |
|                     |         |                  | Unknown.41              | 1     |
|                     |         |                  | Unknown.42              | 3     |
|                     |         |                  | Unknown.44              | 4     |
|                     |         |                  | Unknown.49              | 1     |
|                     |         |                  | Unknown.50              | 7     |
|                     |         |                  | Unknown.52              | 1     |
|                     |         |                  | Unknown.55              | 1     |
|                     |         |                  | Unknown.56              | 2     |

Table 1: Algal species found each treatment

| Herbivore Treatment    | Disturb              | Collection point | Taxa                | Count |
|------------------------|----------------------|------------------|---------------------|-------|
|                        |                      |                  | Unknown.58          | 1     |
|                        |                      |                  | Unknown.63          | 1     |
|                        |                      |                  | Unknown.65          | 1     |
|                        |                      |                  | Unknown.66          | 1     |
|                        |                      |                  | Unknown.68          | 1     |
|                        |                      |                  | Unknown.9           | 7     |
|                        |                      | <b>3</b>         | Anabaena.spp.       | 2     |
|                        |                      |                  | Chlorella.spp.      | 160   |
|                        |                      |                  | Euglena.spp.        | 1     |
|                        |                      |                  | Golenkinia.spp.     | 3     |
|                        |                      |                  | Unknown.18          | 3     |
|                        |                      |                  | Scenedesmus.spp.    | 6     |
|                        |                      |                  | Unknown.15          | 4     |
|                        |                      |                  | Unknown.16          | 1     |
|                        |                      |                  | Unknown.17          | 1     |
|                        |                      |                  | Unknown.19          | 1     |
|                        |                      |                  | Unknown.21          | 4     |
|                        |                      |                  | Unknown.22          | 4     |
|                        |                      |                  | Unknown.23          | 2     |
|                        |                      |                  | Unknown.25          | 2     |
|                        |                      |                  | Unknown.27          | 1     |
|                        |                      |                  | Unknown.32          | 10    |
|                        |                      |                  | Unknown.34          | 1     |
|                        |                      |                  | Unknown.35          | 1     |
|                        |                      |                  | Unknown.38          | 5     |
|                        |                      |                  | Unknown.56          | 1     |
|                        |                      |                  | Unknown.60          | 1     |
|                        |                      |                  | Unknown.62          | 1     |
|                        |                      |                  | Unknown.65          | 1     |
|                        |                      |                  | Unknown.9           | 5     |
| <i>Physsa</i> sp. only | <b>Not Disturbed</b> | <b>1</b>         | Ankistrodesmus.spp. | 1     |
|                        |                      |                  | Chlorella.spp.      | 821   |
|                        |                      |                  | Chodatella.spp.     | 8     |
|                        |                      |                  | Chroococcus.spp.    | 1     |
|                        |                      |                  | Nitzschia.spp.      | 1     |
|                        |                      |                  | Quadrigula.spp.     | 1     |
|                        |                      |                  | Scenedesmus.spp.    | 57    |
|                        |                      |                  | Unknown.36          | 2     |
|                        |                      |                  | Unknown.10          | 1     |
|                        |                      |                  | Unknown.14          | 2     |
|                        |                      |                  | Unknown.15          | 2     |

Table 1: Algal species found each treatment

| Herbivore Treatment | Disturb | Collection point | Taxa                    | Count |
|---------------------|---------|------------------|-------------------------|-------|
|                     |         |                  | Unknown.17              | 2     |
|                     |         |                  | Unknown.21              | 8     |
|                     |         |                  | Unknown.31              | 2     |
|                     |         |                  | Unknown.32              | 22    |
|                     |         |                  | Unknown.34              | 1     |
|                     |         |                  | Unknown.35              | 2     |
|                     |         |                  | Unknown.38              | 5     |
|                     |         |                  | Unknown.39              | 7     |
|                     |         |                  | Unknown.42              | 2     |
|                     |         |                  | Unknown.44              | 3     |
|                     |         |                  | Unknown.45              | 1     |
|                     |         |                  | Unknown.48              | 1     |
|                     |         |                  | Unknown.9               | 34    |
|                     |         | <b>2</b>         | Ankistrodesmus.spp.     | 3     |
|                     |         |                  | Chlorella.spp.          | 1555  |
|                     |         |                  | Chodatella.spp.         | 4     |
|                     |         |                  | Chroococcus.spp.        | 1     |
|                     |         |                  | Coccomyxa               | 1     |
|                     |         |                  | Pseudococcomyxa.spp.    |       |
|                     |         |                  | Craticula.spp.          | 1     |
|                     |         |                  | Euglena.spp.            | 2     |
|                     |         |                  | Golenkinia.spp.         | 1     |
|                     |         |                  | Unknown.18              | 2     |
|                     |         |                  | Monoraphidium contortum | 3     |
|                     |         |                  | Nitzschia.spp.          | 8     |
|                     |         |                  | Quadrigula.spp.         | 2     |
|                     |         |                  | Scenedesmus.spp.        | 388   |
|                     |         |                  | Unknown.10              | 2     |
|                     |         |                  | Unknown.14              | 1     |
|                     |         |                  | Unknown.17              | 14    |
|                     |         |                  | Unknown.19              | 1     |
|                     |         |                  | Unknown.21              | 2     |
|                     |         |                  | Unknown.22              | 4     |
|                     |         |                  | Unknown.25              | 3     |
|                     |         |                  | Unknown.26              | 7     |
|                     |         |                  | Unknown.3               | 1     |
|                     |         |                  | Unknown.30              | 2     |
|                     |         |                  | Unknown.31              | 1     |
|                     |         |                  | Unknown.32              | 6     |
|                     |         |                  | Unknown.34              | 1     |
|                     |         |                  | Unknown.35              | 12    |

Table 1: Algal species found each treatment

| Herbivore Treatment | Disturb | Collection point | Taxa                    | Count |
|---------------------|---------|------------------|-------------------------|-------|
|                     |         |                  | Unknown.38              | 7     |
|                     |         |                  | Unknown.42              | 1     |
|                     |         |                  | Unknown.43              | 4     |
|                     |         |                  | Unknown.44              | 2     |
|                     |         |                  | Unknown.45              | 1     |
|                     |         |                  | Unknown.50              | 6     |
|                     |         |                  | Unknown.54              | 1     |
|                     |         |                  | Unknown.55              | 2     |
|                     |         |                  | Unknown.56              | 1     |
|                     |         |                  | Unknown.57              | 3     |
|                     |         |                  | Unknown.61              | 1     |
|                     |         |                  | Unknown.62              | 4     |
|                     |         |                  | Unknown.66              | 2     |
|                     |         |                  | Unknown.67              | 1     |
|                     |         |                  | Unknown.9               | 15    |
|                     |         | <b>3</b>         | Anabaena.spp.           | 41    |
|                     |         |                  | Ankistrodesmus.spp.     | 2     |
|                     |         |                  | Chlorella.spp.          | 4429  |
|                     |         |                  | Chodatella.spp.         | 3     |
|                     |         |                  | Chroococcus.spp.        | 12    |
|                     |         |                  | Coccomyxa               | 1     |
|                     |         |                  | Pseudococcomyxa.spp.    |       |
|                     |         |                  | Golenkinia.spp.         | 2     |
|                     |         |                  | Unknown.18              | 2     |
|                     |         |                  | Monoraphidium contortum | 5     |
|                     |         |                  | Nitzschia.spp.          | 4     |
|                     |         |                  | Scenedesmus.spp.        | 217   |
|                     |         |                  | Unknown.10              | 2     |
|                     |         |                  | Unknown.14              | 1     |
|                     |         |                  | Unknown.15              | 3     |
|                     |         |                  | Unknown.16              | 2     |
|                     |         |                  | Unknown.21              | 4     |
|                     |         |                  | Unknown.23              | 2     |
|                     |         |                  | Unknown.25              | 2     |
|                     |         |                  | Unknown.26              | 3     |
|                     |         |                  | Unknown.3               | 1     |
|                     |         |                  | Unknown.30              | 2     |
|                     |         |                  | Unknown.32              | 291   |
|                     |         |                  | Unknown.35              | 2     |
|                     |         |                  | Unknown.38              | 3     |
|                     |         |                  | Unknown.41              | 3     |



Table 1: Algal species found each treatment

| Herbivore Treatment   | Disturb          | Collection point | Taxa                | Count |
|-----------------------|------------------|------------------|---------------------|-------|
|                       |                  |                  | Unknown.42          | 1     |
|                       |                  |                  | Unknown.43          | 5     |
|                       |                  |                  | Unknown.45          | 8     |
|                       |                  |                  | Unknown.48          | 2     |
|                       |                  |                  | Unknown.50          | 5     |
|                       |                  |                  | Unknown.52          | 1     |
|                       |                  |                  | Unknown.54          | 1     |
|                       |                  |                  | Unknown.60          | 4     |
|                       |                  |                  | Unknown.61          | 1     |
|                       |                  |                  | Unknown.62          | 3     |
|                       |                  |                  | Unknown.63          | 3     |
|                       |                  |                  | Unknown.64          | 10    |
|                       |                  |                  | Unknown.67          | 1     |
|                       |                  |                  | Unknown.9           | 12    |
| <i>Phyca</i> sp. only | <b>Disturbed</b> | <b>1</b>         | Ankistrodesmus.spp. | 2     |
|                       |                  |                  | Chlorella.spp.      | 1374  |
|                       |                  |                  | Chodatella.spp.     | 1     |
|                       |                  |                  | Euglena.spp.        | 1     |
|                       |                  |                  | Golenkinia.spp.     | 1     |
|                       |                  |                  | Nitzschia.spp.      | 1     |
|                       |                  |                  | Quadrigula.spp.     | 1     |
|                       |                  |                  | Scenedesmus.spp.    | 70    |
|                       |                  |                  | Unknown.10          | 1     |
|                       |                  |                  | Unknown.11          | 1     |
|                       |                  |                  | Unknown.14          | 4     |
|                       |                  |                  | Unknown.16          | 1     |
|                       |                  |                  | Unknown.17          | 10    |
|                       |                  |                  | Unknown.21          | 13    |
|                       |                  |                  | Unknown.27          | 2     |
|                       |                  |                  | Unknown.30          | 1     |
|                       |                  |                  | Unknown.31          | 4     |
|                       |                  |                  | Unknown.32          | 8     |
|                       |                  |                  | Unknown.34          | 2     |
|                       |                  |                  | Unknown.35          | 2     |
|                       |                  |                  | Unknown.38          | 4     |
|                       |                  |                  | Unknown.39          | 18    |
|                       |                  |                  | Unknown.4           | 2     |
|                       |                  |                  | Unknown.42          | 10    |
|                       |                  |                  | Unknown.44          | 10    |
|                       |                  |                  | Unknown.45          | 2     |
|                       |                  |                  | Unknown.9           | 45    |

Table 1: Algal species found each treatment

| Herbivore Treatment | Disturb | Collection point | Taxa                    | Count |
|---------------------|---------|------------------|-------------------------|-------|
|                     |         | <b>2</b>         | Ankistrodesmus.spp.     | 7     |
|                     |         |                  | Chlorella.spp.          | 1160  |
|                     |         |                  | Chodatella.spp.         | 5     |
|                     |         |                  | Chroococcus.spp.        | 1     |
|                     |         |                  | Coccomyxa               | 1     |
|                     |         |                  | Pseudococcomyxa.spp.    |       |
|                     |         |                  | Craticula.spp.          | 1     |
|                     |         |                  | Euglena.spp.            | 15    |
|                     |         |                  | Golenkinia.spp.         | 1     |
|                     |         |                  | known.18                | 3     |
|                     |         |                  | Monoraphidium contortum | 5     |
|                     |         |                  | Nitzschia.spp.          | 10    |
|                     |         |                  | Quadrigula.spp.         | 3     |
|                     |         |                  | Scenedesmus.spp.        | 369   |
|                     |         |                  | Unknwn.36               | 4     |
|                     |         |                  | Unknown.10              | 8     |
|                     |         |                  | Unknown.11              | 4     |
|                     |         |                  | Unknown.14              | 6     |
|                     |         |                  | Unknown.15              | 1     |
|                     |         |                  | Unknown.17              | 6     |
|                     |         |                  | Unknown.19              | 2     |
|                     |         |                  | Unknown.21              | 259   |
|                     |         |                  | Unknown.22              | 11    |
|                     |         |                  | Unknown.25              | 2     |
|                     |         |                  | Unknown.26              | 2     |
|                     |         |                  | Unknown.3               | 2     |
|                     |         |                  | Unknown.30              | 4     |
|                     |         |                  | Unknown.31              | 1     |
|                     |         |                  | Unknown.32              | 4     |
|                     |         |                  | Unknown.34              | 2     |
|                     |         |                  | Unknown.35              | 18    |
|                     |         |                  | Unknown.37              | 4     |
|                     |         |                  | Unknown.38              | 4     |
|                     |         |                  | Unknown.39              | 2     |
|                     |         |                  | Unknown.4               | 2     |
|                     |         |                  | Unknown.42              | 8     |
|                     |         |                  | Unknown.43              | 2     |
|                     |         |                  | Unknown.44              | 8     |
|                     |         |                  | Unknown.50              | 8     |
|                     |         |                  | Unknown.55              | 2     |
|                     |         |                  | Unknown.57              | 4     |

Table 1: Algal species found each treatment

| Herbivore Treatment | Disturb | Collection point | Taxa                    | Count |
|---------------------|---------|------------------|-------------------------|-------|
|                     |         |                  | Unknown.6               | 3     |
|                     |         |                  | Unknown.60              | 1     |
|                     |         |                  | Unknown.62              | 1     |
|                     |         |                  | Unknown.65              | 1     |
|                     |         |                  | Unknown.66              | 23    |
|                     |         |                  | Unknown.68              | 1     |
|                     |         |                  | Unknown.69              | 1     |
|                     |         |                  | Unknown.9               | 31    |
|                     |         | <b>3</b>         | Anabaena.spp.           | 3     |
|                     |         |                  | Ankistrodesmus.spp.     | 5     |
|                     |         |                  | Chlorella.spp.          | 2686  |
|                     |         |                  | Chodatella.spp.         | 1     |
|                     |         |                  | Chroococcus.spp.        | 36    |
|                     |         |                  | Euglena.spp.            | 2     |
|                     |         |                  | Golenkinia.spp.         | 9     |
|                     |         |                  | Unknown.18              | 12    |
|                     |         |                  | Monoraphidium arcuatum  | 1     |
|                     |         |                  | Monoraphidium contortum | 10    |
|                     |         |                  | Nitzschia.spp.          | 7     |
|                     |         |                  | Quadrigula.spp.         | 10    |
|                     |         |                  | Scenedesmus.spp.        | 937   |
|                     |         |                  | Unknown.36              | 8     |
|                     |         |                  | Unknown.10              | 33    |
|                     |         |                  | Unknown.11              | 7     |
|                     |         |                  | Unknown.14              | 3     |
|                     |         |                  | Unknown.15              | 7     |
|                     |         |                  | Unknown.16              | 1     |
|                     |         |                  | Unknown.17              | 30    |
|                     |         |                  | Unknown.19              | 3     |
|                     |         |                  | Unknown.21              | 62    |
|                     |         |                  | Unknown.22              | 1     |
|                     |         |                  | Unknown.23              | 4     |
|                     |         |                  | Unknown.25              | 10    |
|                     |         |                  | Unknown.26              | 14    |
|                     |         |                  | Unknown.27              | 6     |
|                     |         |                  | Unknown.3               | 4     |
|                     |         |                  | Unknown.30              | 2     |
|                     |         |                  | Unknown.32              | 153   |
|                     |         |                  | Unknown.34              | 117   |
|                     |         |                  | Unknown.35              | 26    |

Table 1: Algal species found each treatment

| Herbivore Treatment        | Disturb              | Collection point | Taxa                    | Count |
|----------------------------|----------------------|------------------|-------------------------|-------|
|                            |                      |                  | Unknown.37              | 3     |
|                            |                      |                  | Unknown.38              | 41    |
|                            |                      |                  | Unknown.39              | 9     |
|                            |                      |                  | Unknown.4               | 1     |
|                            |                      |                  | Unknown.41              | 1     |
|                            |                      |                  | Unknown.43              | 17    |
|                            |                      |                  | Unknown.44              | 4     |
|                            |                      |                  | Unknown.45              | 9     |
|                            |                      |                  | Unknown.48              | 25    |
|                            |                      |                  | Unknown.50              | 7     |
|                            |                      |                  | Unknown.51              | 4     |
|                            |                      |                  | Unknown.54              | 18    |
|                            |                      |                  | Unknown.55              | 1     |
|                            |                      |                  | Unknown.56              | 1     |
|                            |                      |                  | Unknown.57              | 6     |
|                            |                      |                  | Unknown.58              | 1     |
|                            |                      |                  | Unknown.60              | 14    |
|                            |                      |                  | Unknown.61              | 2     |
|                            |                      |                  | Unknown.62              | 26    |
|                            |                      |                  | Unknown.63              | 8     |
|                            |                      |                  | Unknown.64              | 6     |
|                            |                      |                  | Unknown.65              | 2     |
|                            |                      |                  | Unknown.9               | 128   |
| <b><i>No Herbivore</i></b> | <b>Not Disturbed</b> | <b>1</b>         | Ankistrodesmus.spp.     | 1     |
|                            |                      |                  | Chlorella.spp.          | 969   |
|                            |                      |                  | Chodatella.spp.         | 2     |
|                            |                      |                  | Chroococcus.spp.        | 1     |
|                            |                      |                  | Euglena.spp.            | 1     |
|                            |                      |                  | Golenkinia.spp.         | 2     |
|                            |                      |                  | Monoraphidium contortum | 1     |
|                            |                      |                  | Nitzschia.spp.          | 2     |
|                            |                      |                  | Scenedesmus.spp.        | 111   |
|                            |                      |                  | Unknown.36              | 3     |
|                            |                      |                  | Unknown.11              | 1     |
|                            |                      |                  | Unknown.14              | 2     |
|                            |                      |                  | Unknown.16              | 3     |
|                            |                      |                  | Unknown.17              | 6     |
|                            |                      |                  | Unknown.21              | 8     |
|                            |                      |                  | Unknown.23              | 1     |
|                            |                      |                  | Unknown.25              | 2     |

Table 1: Algal species found each treatment

| Herbivore Treatment | Disturb | Collection point | Taxa                    | Count |
|---------------------|---------|------------------|-------------------------|-------|
|                     |         |                  | Unknown.27              | 1     |
|                     |         |                  | Unknown.3               | 1     |
|                     |         |                  | Unknown.30              | 1     |
|                     |         |                  | Unknown.32              | 103   |
|                     |         |                  | Unknown.34              | 3     |
|                     |         |                  | Unknown.35              | 4     |
|                     |         |                  | Unknown.37              | 2     |
|                     |         |                  | Unknown.38              | 12    |
|                     |         |                  | Unknown.39              | 11    |
|                     |         |                  | Unknown.40              | 1     |
|                     |         |                  | Unknown.42              | 1     |
|                     |         |                  | Unknown.43              | 1     |
|                     |         |                  | Unknown.44              | 6     |
|                     |         |                  | Unknown.45              | 1     |
|                     |         |                  | Unknown.50              | 2     |
|                     |         |                  | Unknown.51              | 1     |
|                     |         |                  | Unknown.52              | 1     |
|                     |         |                  | Unknown.9               | 11    |
|                     |         | <b>2</b>         | Anabaena.spp.           | 1     |
|                     |         |                  | Ankistrodesmus.spp.     | 4     |
|                     |         |                  | Chlorella.spp.          | 1240  |
|                     |         |                  | Chodatella.spp.         | 2     |
|                     |         |                  | Chroococcus.spp.        | 1     |
|                     |         |                  | Craticula.spp.          | 2     |
|                     |         |                  | Euglena.spp.            | 3     |
|                     |         |                  | Unknown.18              | 1     |
|                     |         |                  | Monoraphidium contortum | 4     |
|                     |         |                  | Nitzschia.spp.          | 5     |
|                     |         |                  | Quadrigula.spp.         | 1     |
|                     |         |                  | Scenedesmus.spp.        | 395   |
|                     |         |                  | Unknown.36              | 1     |
|                     |         |                  | Unknown.10              | 4     |
|                     |         |                  | Unknown.14              | 1     |
|                     |         |                  | Unknown.17              | 4     |
|                     |         |                  | Unknown.19              | 1     |
|                     |         |                  | Unknown.21              | 3     |
|                     |         |                  | Unknown.22              | 3     |
|                     |         |                  | Unknown.25              | 1     |
|                     |         |                  | Unknown.26              | 3     |
|                     |         |                  | Unknown.3               | 1     |
|                     |         |                  | Unknown.30              | 3     |

Table 1: Algal species found each treatment

| Herbivore Treatment | Disturb | Collection point | Taxa                    | Count |
|---------------------|---------|------------------|-------------------------|-------|
|                     |         |                  | Unknown.32              | 2     |
|                     |         |                  | Unknown.34              | 3     |
|                     |         |                  | Unknown.35              | 2     |
|                     |         |                  | Unknown.37              | 1     |
|                     |         |                  | Unknown.38              | 2     |
|                     |         |                  | Unknown.43              | 3     |
|                     |         |                  | Unknown.45              | 1     |
|                     |         |                  | Unknown.50              | 8     |
|                     |         |                  | Unknown.54              | 1     |
|                     |         |                  | Unknown.55              | 2     |
|                     |         |                  | Unknown.56              | 2     |
|                     |         |                  | Unknown.6               | 1     |
|                     |         |                  | Unknown.60              | 4     |
|                     |         |                  | Unknown.62              | 2     |
|                     |         |                  | Unknown.64              | 4     |
|                     |         |                  | Unknown.65              | 1     |
|                     |         |                  | Unknown.66              | 1     |
|                     |         |                  | Unknown.68              | 1     |
|                     |         |                  | Unknown.69              | 1     |
|                     |         |                  | Unknown.9               | 20    |
|                     |         | <b>3</b>         | Anabaena.spp.           | 73    |
|                     |         |                  | Ankistrodesmus.spp.     | 5     |
|                     |         |                  | Chlorella.spp.          | 3543  |
|                     |         |                  | Chodatella.spp.         | 4     |
|                     |         |                  | Chroococcus.spp.        | 1     |
|                     |         |                  | Golenkinia.spp.         | 1     |
|                     |         |                  | Unknown.18              | 3     |
|                     |         |                  | Monoraphidium contortum | 5     |
|                     |         |                  | Nitzschia.spp.          | 6     |
|                     |         |                  | Scenedesmus.spp.        | 224   |
|                     |         |                  | Unknown.10              | 2     |
|                     |         |                  | Unknown.11              | 1     |
|                     |         |                  | Unknown.14              | 2     |
|                     |         |                  | Unknown.15              | 1     |
|                     |         |                  | Unknown.17              | 5     |
|                     |         |                  | Unknown.19              | 1     |
|                     |         |                  | Unknown.20              | 1     |
|                     |         |                  | Unknown.21              | 1     |
|                     |         |                  | Unknown.23              | 1     |
|                     |         |                  | Unknown.26              | 3     |
|                     |         |                  | Unknown.3               | 1     |

Table 1: Algal species found each treatment

| Herbivore Treatment        | Disturb          | Collection point | Taxa             | Count |
|----------------------------|------------------|------------------|------------------|-------|
|                            |                  |                  | Unknown.30       | 1     |
|                            |                  |                  | Unknown.31       | 1     |
|                            |                  |                  | Unknown.32       | 271   |
|                            |                  |                  | Unknown.34       | 4     |
|                            |                  |                  | Unknown.35       | 4     |
|                            |                  |                  | Unknown.38       | 2     |
|                            |                  |                  | Unknown.39       | 4     |
|                            |                  |                  | Unknown.4        | 1     |
|                            |                  |                  | Unknown.41       | 2     |
|                            |                  |                  | Unknown.44       | 3     |
|                            |                  |                  | Unknown.45       | 1     |
|                            |                  |                  | Unknown.48       | 1     |
|                            |                  |                  | Unknown.50       | 3     |
|                            |                  |                  | Unknown.51       | 1     |
|                            |                  |                  | Unknown.52       | 2     |
|                            |                  |                  | Unknown.54       | 1     |
|                            |                  |                  | Unknown.55       | 2     |
|                            |                  |                  | Unknown.60       | 4     |
|                            |                  |                  | Unknown.62       | 1     |
|                            |                  |                  | Unknown.9        | 15    |
| <b><i>No Herbivore</i></b> | <b>Disturbed</b> | <b>1</b>         | Chlorella.spp.   | 1347  |
|                            |                  |                  | Golenkinia.spp.  | 1     |
|                            |                  |                  | Unknown.18       | 1     |
|                            |                  |                  | Nitzschia.spp.   | 4     |
|                            |                  |                  | Scenedesmus.spp. | 87    |
|                            |                  |                  | Unknown.11       | 2     |
|                            |                  |                  | Unknown.13       | 1     |
|                            |                  |                  | Unknown.15       | 7     |
|                            |                  |                  | Unknown.16       | 2     |
|                            |                  |                  | Unknown.17       | 13    |
|                            |                  |                  | Unknown.21       | 9     |
|                            |                  |                  | Unknown.23       | 2     |
|                            |                  |                  | Unknown.25       | 4     |
|                            |                  |                  | Unknown.27       | 2     |
|                            |                  |                  | Unknown.30       | 1     |
|                            |                  |                  | Unknown.31       | 6     |
|                            |                  |                  | Unknown.32       | 76    |
|                            |                  |                  | Unknown.34       | 1     |
|                            |                  |                  | Unknown.35       | 2     |
|                            |                  |                  | Unknown.37       | 2     |
|                            |                  |                  | Unknown.38       | 9     |

Table 1: Algal species found each treatment

| Herbivore Treatment | Disturb | Collection point | Taxa                    | Count |
|---------------------|---------|------------------|-------------------------|-------|
|                     |         |                  | Unknown.39              | 11    |
|                     |         |                  | Unknown.42              | 1     |
|                     |         |                  | Unknown.44              | 4     |
|                     |         |                  | Unknown.9               | 34    |
|                     |         | <b>2</b>         | Ankistrodesmus.spp.     | 5     |
|                     |         |                  | Chlorella.spp.          | 1607  |
|                     |         |                  | Chodatella.spp.         | 5     |
|                     |         |                  | Chroococcus.spp.        | 1     |
|                     |         |                  | Craticula.spp.          | 2     |
|                     |         |                  | Euglena.spp.            | 21    |
|                     |         |                  | known.18                | 5     |
|                     |         |                  | Monoraphidium contortum | 3     |
|                     |         |                  | Nitzschia.spp.          | 9     |
|                     |         |                  | Quadrigula.spp.         | 1     |
|                     |         |                  | Scenedesmus.spp.        | 494   |
|                     |         |                  | Unknown.10              | 7     |
|                     |         |                  | Unknown.11              | 4     |
|                     |         |                  | Unknown.15              | 1     |
|                     |         |                  | Unknown.17              | 12    |
|                     |         |                  | Unknown.19              | 1     |
|                     |         |                  | Unknown.21              | 207   |
|                     |         |                  | Unknown.25              | 3     |
|                     |         |                  | Unknown.26              | 1     |
|                     |         |                  | Unknown.3               | 1     |
|                     |         |                  | Unknown.30              | 8     |
|                     |         |                  | Unknown.31              | 1     |
|                     |         |                  | Unknown.32              | 5     |
|                     |         |                  | Unknown.34              | 2     |
|                     |         |                  | Unknown.35              | 1     |
|                     |         |                  | Unknown.37              | 5     |
|                     |         |                  | Unknown.38              | 39    |
|                     |         |                  | Unknown.41              | 1     |
|                     |         |                  | Unknown.42              | 2     |
|                     |         |                  | Unknown.43              | 1     |
|                     |         |                  | Unknown.44              | 7     |
|                     |         |                  | Unknown.50              | 16    |
|                     |         |                  | Unknown.54              | 1     |
|                     |         |                  | Unknown.60              | 2     |
|                     |         |                  | Unknown.61              | 1     |
|                     |         |                  | Unknown.62              | 2     |
|                     |         |                  | Unknown.66              | 14    |



Table 1: Algal species found each treatment

| Herbivore Treatment | Disturb | Collection point | Taxa                    | Count |
|---------------------|---------|------------------|-------------------------|-------|
|                     |         |                  | Unknown.9               | 12    |
|                     |         | <b>3</b>         | Anabaena.spp.           | 6     |
|                     |         |                  | Ankistrodesmus.spp.     | 5     |
|                     |         |                  | Chlorella.spp.          | 1927  |
|                     |         |                  | Chodatella.spp.         | 3     |
|                     |         |                  | Chroococcus.spp.        | 24    |
|                     |         |                  | Coccomyxa               | 3     |
|                     |         |                  | Pseudococcomyxa.spp.    |       |
|                     |         |                  | Euglena.spp.            | 2     |
|                     |         |                  | Golenkinia.spp.         | 6     |
|                     |         |                  | Unknown.18              | 19    |
|                     |         |                  | Monoraphidium contortum | 9     |
|                     |         |                  | Nitzschia.spp.          | 11    |
|                     |         |                  | Quadrigula.spp.         | 5     |
|                     |         |                  | Scenedesmus.spp.        | 861   |
|                     |         |                  | Unknown.36              | 6     |
|                     |         |                  | Unknown.10              | 48    |
|                     |         |                  | Unknown.11              | 6     |
|                     |         |                  | Unknown.14              | 4     |
|                     |         |                  | Unknown.15              | 2     |
|                     |         |                  | Unknown.16              | 2     |
|                     |         |                  | Unknown.17              | 108   |
|                     |         |                  | Unknown.21              | 111   |
|                     |         |                  | Unknown.22              | 2     |
|                     |         |                  | Unknown.23              | 4     |
|                     |         |                  | Unknown.25              | 29    |
|                     |         |                  | Unknown.26              | 33    |
|                     |         |                  | Unknown.27              | 1     |
|                     |         |                  | Unknown.28              | 6     |
|                     |         |                  | Unknown.3               | 17    |
|                     |         |                  | Unknown.30              | 1     |
|                     |         |                  | Unknown.31              | 7     |
|                     |         |                  | Unknown.32              | 79    |
|                     |         |                  | Unknown.34              | 281   |
|                     |         |                  | Unknown.35              | 63    |
|                     |         |                  | Unknown.37              | 2     |
|                     |         |                  | Unknown.38              | 70    |
|                     |         |                  | Unknown.39              | 13    |
|                     |         |                  | Unknown.4               | 2     |
|                     |         |                  | Unknown.40              | 1     |
|                     |         |                  | Unknown.41              | 1     |

Table 1: Algal species found each treatment

| Herbivore Treatment | Disturb | Collection point | Taxa       | Count |
|---------------------|---------|------------------|------------|-------|
|                     |         |                  | Unknown.43 | 9     |
|                     |         |                  | Unknown.44 | 8     |
|                     |         |                  | Unknown.45 | 13    |
|                     |         |                  | Unknown.48 | 75    |
|                     |         |                  | Unknown.50 | 4     |
|                     |         |                  | Unknown.52 | 3     |
|                     |         |                  | Unknown.54 | 3     |
|                     |         |                  | Unknown.55 | 1     |
|                     |         |                  | Unknown.56 | 1     |
|                     |         |                  | Unknown.57 | 14    |
|                     |         |                  | Unknown.6  | 2     |
|                     |         |                  | Unknown.60 | 33    |
|                     |         |                  | Unknown.61 | 1     |
|                     |         |                  | Unknown.62 | 39    |
|                     |         |                  | Unknown.63 | 5     |
|                     |         |                  | Unknown.64 | 25    |
|                     |         |                  | Unknown.65 | 3     |
|                     |         |                  | Unknown.66 | 3     |
|                     |         |                  | Unknown.9  | 73    |
